# Supplementary material for: Aging-Associated Modulation of UFMylation Impairs Proteostasis in C. elegans
Source: Research Square preprint supplement (doi:10.21203/rs.3.rs-6064783/v1), 2025-03-24
Supplement: Supplementary file 1 [file 0eace903ef23e7d00fa0adba.xlsx]

## Sheet: Sheet1
Gene names	Protein names	Protein IDs	Majority protein IDs	Ratio of LFQ intensities EV day 1/EV day 5	log EV day 5/EV day 1	P-value
lfi-1		A0A5E4LZU4;A0A5E4M3N2;H2L0I3;H2L0I4;H2L0I2;A0A5E4LWV7	A0A5E4LZU4;A0A5E4M3N2;H2L0I3;H2L0I4;H2L0I2;A0A5E4LWV7	53.9524	5.75361	0.000113776
fib-1	rRNA 2-O-methyltransferase fibrillarin	Q22053	Q22053	16.6118	4.05413	0.000139488
top-1	DNA topoisomerase 1	O17966	O17966	7.75063	2.95431	0.00034355
rpl-8	60S ribosomal protein L8	Q9XVF7	Q9XVF7	2.80867	1.48989	0.000357939
nol-56	Uncharacterized NOP5 family protein K07C5.4	Q21276	Q21276	2.37296	1.24669	0.000717081
trap-1		Q95XT5	Q95XT5	3.44584	1.78485	0.000815652
rpl-33	60S ribosomal protein L35a	P49180	P49180	1.94439	0.959317	0.00109209
rpl-18	60S ribosomal protein L18	O45946	O45946	1.67186	0.741458	0.00111504
rpl-5	60S ribosomal protein L5	P49405	P49405	1.98292	0.987625	0.00141122
rps-15	40S ribosomal protein S15	Q9XVP0	Q9XVP0	1.59513	0.673675	0.00173728
txdc-12.2		Q9N5S7	Q9N5S7	4.96847	2.3128	0.00178993
rpl-11.2		Q19162	Q19162	1.57235	0.652918	0.00202574
rpl-27	60S ribosomal protein L27	P91914	P91914	1.97047	0.978539	0.00414141
eif-2gamma		Q95XR0	Q95XR0	1.42716	0.51315	0.00556913
hsp-1	Heat shock 70 kDa protein A	P09446	P09446	1.75455	0.811102	0.00908965
rpl-6	60S ribosomal protein L6	P47991	P47991	1.4107	0.496409	0.00951874
iff-1	Eukaryotic translation initiation factor 5A-1;Eukaryotic translation initiation factor 5A	P34563;G1K0V8;G1K0V9	P34563;G1K0V8	1.72558	0.787086	0.0132585
rpl-36	60S ribosomal protein L36	P49181	P49181	2.21537	1.14755	0.0175895
ran-1	GTP-binding nuclear protein ran-1	O17915	O17915	1.40523	0.490809	0.0178197
rpl-3	60S ribosomal protein L3	P50880;G5ECE5;G5EEC0	P50880;G5ECE5;G5EEC0	1.61998	0.695978	0.0222544
R53.4	Putative ATP synthase subunit f, mitochondrial	Q22021	Q22021	1.48645	0.571875	0.0241118
K01G5.5	Putative H/ACA ribonucleoprotein complex subunit 4	O17919	O17919	1.75888	0.814661	0.0323441
rps-3	40S ribosomal protein S3	P48152	P48152	1.17732	0.235507	0.0152886
