# Supplementary material for: Aging-Associated Modulation of UFMylation Impairs Proteostasis in C. elegans
Source: Research Square preprint supplement (doi:10.21203/rs.3.rs-6064783/v1), 2025-03-24
Supplement: Supplementary file 2 [file b98b0834298e4ef42df78743.docx]

**Supplemental Table 4**

| **Strain** | **Genotype** | **Source** | **RRID** |
| --- | --- | --- | --- |
| N2 | Wild type, Bristol | CGC | RRID:WB-STRAIN:WBStrain00000001 |
| CF512 | fer-15(b26)II;fem-1(hc17)IV | CGC | RRID:WB-STRAIN:WBStrain00004828 |
| CL2006 | (pCL12[unc-54p::human Aβ3-42],  pRF4(rol-6(sulO06)) | CGC | RRID:WB-STRAIN:WBStrain00005094 |
| AM140 | (rmIs132[unc54p::Q35::YFP] | CGC | RRID:WB-STRAIN:AM140) |
| AM1126 | rmIs284 [pF25B3.3::Q35::YFP] | A gift from  Prof. Richard Morimoto | N/A |
| MQD2801 | ufm-1(hq493[ufm-1p::3XHA::ufm-1]) III | A gift from  Prof. Meng Qiu Dong created for this project | N/A |
| PP563 | unc-119(ed4); hhIs64[unc-119(+); sur-5::UbV-GFP]III | A gift from  From Dr. Thorsten Hoppe | RRID:WB-STRAIN:WBStrain00044739 |
| TU3401 | unc-46(e177) dpy-11(e224) uIs69 [(pCFJ90) myo-2p::mCherry + unc-119p::sid-1]. | CGC | RRID:WB-STRAIN:WBStrain00035057 |
| EHC205 | CL2006 X VP303 (rde-1(ne219) V; kbIs7 [nhx-2p::rde-1 + rol-6(su1006)].) | Zhu et al 2025 | N/A |
| EHC206 | CL2006 X DCL569 X RBW264 (mkcSi13 [sun-1p::rde-1::sun-1 3'UTR + unc-119(+)] II; rde-1(mkc36) V.) | Zhu et al 2025 | N/A |
| EHC207 | CL2006 X TU3401(unc-46(e177) dpy-11(e224) uIs69 [(pCFJ90) myo-2p::mCherry + unc-119p::sid-1].) | Zhu et al 2025 | N/A |
| EHC208 | CL2006 X WM118(rde-1(ne300) V; neIs9 [myo-3::HA::RDE-1 + rol-6(su1006)].) | Zhu et al 2025 | N/A |
| EHC211 | AM1126xWM118 | Zhu et al 2025 | N/A |
| EHC212 | AM1126xDCL569 | Zhu et al 2025 | N/A |
| EHC160 | AM1126xTU3401 | This study | N/A |

**Supplemental Table 5**

Primers list:

| **Gene** | **Forward primer(5'-3')** | **Reverse primer (5'-3')** |
| --- | --- | --- |
| *ufm-1* RNAi in PL4440 Plasmid | GAT GCTAGC ATG TCG GGT GGA ACA GCA GC | ACA CCCGGG C GGC ACG GAG AGG ACC TTG |
| *ufm-1* RNAi in *daf-16* Plasmid | GAT GGTACC ATG TCG GGT GGA ACA GCA GC | GAT AAGCTT C GGC ACG GAG AGG ACC TTG |
| *ufm-1* RNAi in *skn-1* Plasmid | GAT GGTACC ATG TCG GGT GGA ACA GCA GC | GAT GTCGAC C GGC ACG GAG AGG ACC TTG |
| *ufm-1* RNAi in *pqm-1* Plasmid | GAT GGTACC ATG TCG GGT GGA ACA GCA GC | GAT AAGCTT C GGC ACG GAG AGG ACC TTG |
| *odr-8* RNAi | GAT ACTAGT CGA ACG TCT TTC AAT GGC | ACA ACCGGT CCT TAA CTG TTG GAA CCA GC |
| *fib-1* RNAi | ATG ACCGGT TGA ACT TCT CCT CCT TCA GC | ATG GCTAGC AAA CGT TGT CCC AAT TGT CG |
| *sip-1* RNAi | ATG ACCGGT TCA CTC TTC CAA AGG ACG | ATG GCTAGC ATC TAG AAA GTT GGG GGC |
| *daf-21* RNAi | ATG ACCGGT CAA GCT TGG TCT CGA TAT CG | ATG GCTAGC CGG AAC TTT ATT TGG GTT CG |
| *hsp-1* RNAi | ATG ACCGGT CCT TCA ACC TTA AGC AGA CC | ATG GCTAGC GCA CTC TGG TAA AGC TTG G |
| *kin-19* RNAi | ATG ACCGGT GGC CGA ACA TGT TTT TGG | ATG GCTAGC CAG ATG TGA GAG ACT CAA GC |
| *atp-2* RNAi | ATG ACCGGT CCT TTT AGG GCA TTT GGG | ATG GCTAGC TAT AAC GCC GAC ACT TCG |
| *lfi-1* RNAi | ATG ACCGGT CCA CAG ACT GCT TGA CC | ATG GCTAGC GTG CAC ATG AAA ATC GGG |
| *ant-1.1* RNAi | ATG ACCGGT CAC AGG TGC AAT AAC CG | ATG GCTAGC GAC GAA ATC CAG AAG TTC C |
| *cpl-1* RNAi | ATG ACCGGT CAG AAG GAG ATG AGG AGC | ATG GCTAGC CAC GAG TTC TTG ACA ATC C |
| *trap-1* RNAi | ATG ACCGGT ACC GTG TCA CCA AAG GC | ATG GCTAGC CTA AAA CAA GAT GAG GCC GC |
| *top-1* RNAi | ATG ACCGGT TCA GTC GAT GTG TAT GCG | ATG GCTAGC CTA ACG TTT TCT TTC TCC CC |

**Cloning primers:**

**Supplemental Table 6**

Primers list:

| **Gene** | **Forward primer (5'-3')** | **Reverse primer (5'-3')** |
| --- | --- | --- |
| *ufm-1* RNAi | CTA ACA AGT GAT CCG AAG CTC C | CAA CTC CGT CGT TCG TAA TG |
| *coq-5* RNAi | CGC AAA AGT GAC AGT TTC CG | CGA ACA ACC TTT TCA GGG TG |
| *odr-8* RNAi | CAA TCA CAG ATT CTT CCT GG | GCT CCT TCC ATA AGA ACA TG |
| *daf-21* RNAi | GCT CTT GAC AAG ATT CGC | GAT TCC GGT ATC CAT AAT GG |
| *hsp-1* RNAi | GCC AAG AAT CAA GTT GCC | AGA TGA CCT TGA ATG GCC |
| *sip-1* RNAi | ACA TGA TGC CAT ACT GGG | TTG ACA CAG AAC TTC TGG G |
| *daf-16* RNAi | CTT CAA GCC AAT GCC ACT ACC | GGA GAT GAG TTG GAT GTT GAT |
| *skn-1* RNAi | CCA TAT CAC TCA CAG AGA CAC | CCA ACT TTC CGT AGA AAC G |
| *pqm-1* RNAi | TCCAGAGAGTATCGACCAAGG | TCATTGATATTTGATAAGCCATCTTT |

**qPCR primers:**
