# Supplementary material for: Aging-Associated Modulation of UFMylation Impairs Proteostasis in C. elegans
Source: Research Square preprint supplement (doi:10.21203/rs.3.rs-6064783/v1), 2025-03-24
Supplement: Supplementary file 3 [file f0c5f31b3e24c340daae3ba1.xlsx]

## Sheet: Sheet1
Gene names	Protein names	Protein IDs	Majority protein IDs	Ratio of LFQ intensities EV day 1/EV day 5	log EV day 5/EV day 1	P-value
ule-5		Q9XWT3	Q9XWT3	0.104391	-3.25993	2.66232e-06
rpl-4	60S ribosomal protein L4	O02056	O02056	0.656479	-0.60718	6.58492e-05
C08F11.12;Y45F10C.2	UPF0375 protein C08F11.12;UPF0375 protein Y45F10C.2	Q9U3R0;O45941	Q9U3R0;O45941	0.062016	-4.01122	6.82929e-05
rps-7	40S ribosomal protein S7	Q23312	Q23312	0.339489	-1.55856	7.93994e-05
rpl-20	60S ribosomal protein L18a	O44480	O44480	0.499374	-1.00181	8.11242e-05
rps-20		Q8WQA8	Q8WQA8	0.628433	-0.67017	0.000239841
gpd-4;gpd-1	Glyceraldehyde-3-phosphate dehydrogenase 4;Glyceraldehyde-3-phosphate dehydrogenase 1	P17331;P04970	P17331;P04970	0.48729	-1.03715	0.000696129
rps-17	40S ribosomal protein S17	O01692	O01692	0.404066	-1.30734	0.00143949
rps-22		O17218;A8WIR1	O17218;A8WIR1	0.427036	-1.22757	0.0016068
rps-2	40S ribosomal protein S2	P51403	P51403	0.577958	-0.790963	0.00164335
rps-1	40S ribosomal protein S3a	P48154	P48154	0.515276	-0.956583	0.00221922
perm-4		O44144	O44144	0.311721	-1.68167	0.0028126
sip-1	Stress-induced protein 1	Q20363	Q20363	0.339748	-1.55746	0.00583791
F59B1.2		O61880	O61880	0.272284	-1.87681	0.00615531
rps-8	40S ribosomal protein S8	P48156;V6CM07	P48156;V6CM07	0.648434	-0.624968	0.00722473
rps-4	40S ribosomal protein S4	Q9N3X2	Q9N3X2	0.641477	-0.64053	0.00807988
rps-27	40S ribosomal protein S27	Q9TXP0	Q9TXP0	0.494308	-1.01652	0.0082639
rps-14	40S ribosomal protein S14	P48150	P48150	0.458241	-1.12582	0.00831904
cgh-1	ATP-dependent RNA helicase cgh-1	Q95YF3	Q95YF3	0.697035	-0.520696	0.0103082
C08F11.11	UPF0375 protein C08F11.11	O62053	O62053	0.465687	-1.10257	0.0103267
rpl-38	60S ribosomal protein L38	O17570	O17570	0.251288	-1.99259	0.0130352
F33E11.3		O61853	O61853	0.667252	-0.583696	0.0138613
rpl-28	60S ribosomal protein L28	Q21930	Q21930	0.590657	-0.759607	0.0141309
perm-2		O44145	O44145	0.259592	-1.94568	0.0161911
cpl-1		O45734	O45734	0.146	-2.77596	0.0177366
tbb-2;tbb-1;ben-1	Tubulin beta-2 chain	P52275;O17921;Q18817;CON__ENSEMBL:ENSBTAP00000025008	P52275;O17921;Q18817	0.718125	-0.477693	0.0197228
rpl-39	60S ribosomal protein L39	P52814	P52814	0.483598	-1.04812	0.0218668
vit-6	Vitellogenin-6	P18948	P18948	0.432195	-1.21025	0.0225247
car-1		Q9XW17	Q9XW17	0.444182	-1.17078	0.0233386
	Ribosomal protein L37	O62388;P49622	O62388	0.75151	-0.412136	0.0261725
ant-1.1		O45865;G5EFW8;G5EFU2	O45865	0.751999	-0.411198	0.0263146
rps-26	40S ribosomal protein S26	O45499	O45499	0.671764	-0.573974	0.0312741
rpl-32		Q22716;B7WN95	Q22716;B7WN95	0.716443	-0.481076	0.0341183
rps-30		Q18231	Q18231	0.556494	-0.845563	0.036232
rpl-19	60S ribosomal protein L19	O02639	O02639	0.677423	-0.561871	0.03637
rps-11		Q20206	Q20206	0.717332	-0.479287	0.0422604
acer-1		Q18599	Q18599	0.680854	-0.554583	0.0488831
rpl-10	60S ribosomal protein L10	Q09533	Q09533	0.768909	-0.379116	0.0434129
